# Supplementary material
Source: PubMed Central journal article supplement (PMC4684649)

## Supplementary Data

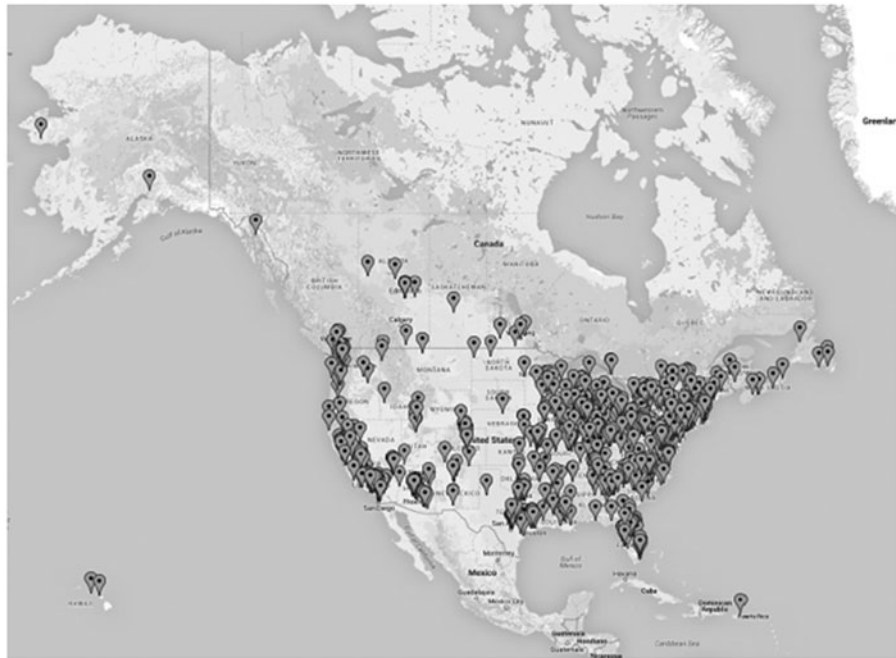

**SUPPLEMENTARY FIG. S1.** Location of participants in NATCSS.

Supplement: Supp_Fig1.pdf [file Supp_Fig1.pdf]
